# Supplementary material
Source: HighWire-hosted journal article supplement (https://jcp.bmj.com/content/jclinpath-2015-203599)
Supplement: inline-supplementary-material-1 [file inline-supplementary-material-1.pdf]

**Supplementary Table 1 Patient Demographic Data and Tumour Characteristics**

| <b>Patient</b> | <b>Age (years)</b> | <b>Sex</b> | <b>Differentiation</b> | <b>T-stage</b> | <b>N-stage</b> | <b>M-stage</b> | <b>Clinical Stage</b> |
|----------------|--------------------|------------|------------------------|----------------|----------------|----------------|-----------------------|
| 1              | 84                 | Female     | Moderate               | 2              | 0              | 0              | II                    |
| 2              | 72                 | Male       | Moderate               | 2              | 0              | 0              | II                    |
| 3              | 71                 | Female     | Moderate               | 3              | 0              | 0              | III                   |
| 4              | 59                 | Male       | Moderate               | 3              | 0              | 0              | III                   |
| 5              | 75                 | Male       | Moderate               | 3              | 0              | 0              | III                   |
| 6              | 76                 | Male       | Moderate               | 1              | 0              | 0              | I                     |
| 7              | 30                 | Female     | Moderate               | 2              | 0              | 0              | II                    |
| 8              | 43                 | Male       | Moderate               | 3              | 0              | 0              | III                   |
| 9              | 47                 | Male       | Moderate               | 2              | 0              | 0              | II                    |
| 10             | 76                 | Male       | Moderate               | 2              | 0              | 0              | II                    |
