# Supplementary material
Source: HighWire-hosted journal article supplement (https://jcp.bmj.com/content/jclinpath-2015-203599)

**Supplemental Figure 1.** Representative DAB IHC stained sections of 10 moderately differentiated OTSCC demonstrating expression of p63 (A, brown), SALL4 (B, brown), SOX2 (C, brown), NANOG (D, brown), pSTAT3 (E, brown), CD44 (F, brown) and OCT4 (G, brown).

Original magnification: 400X

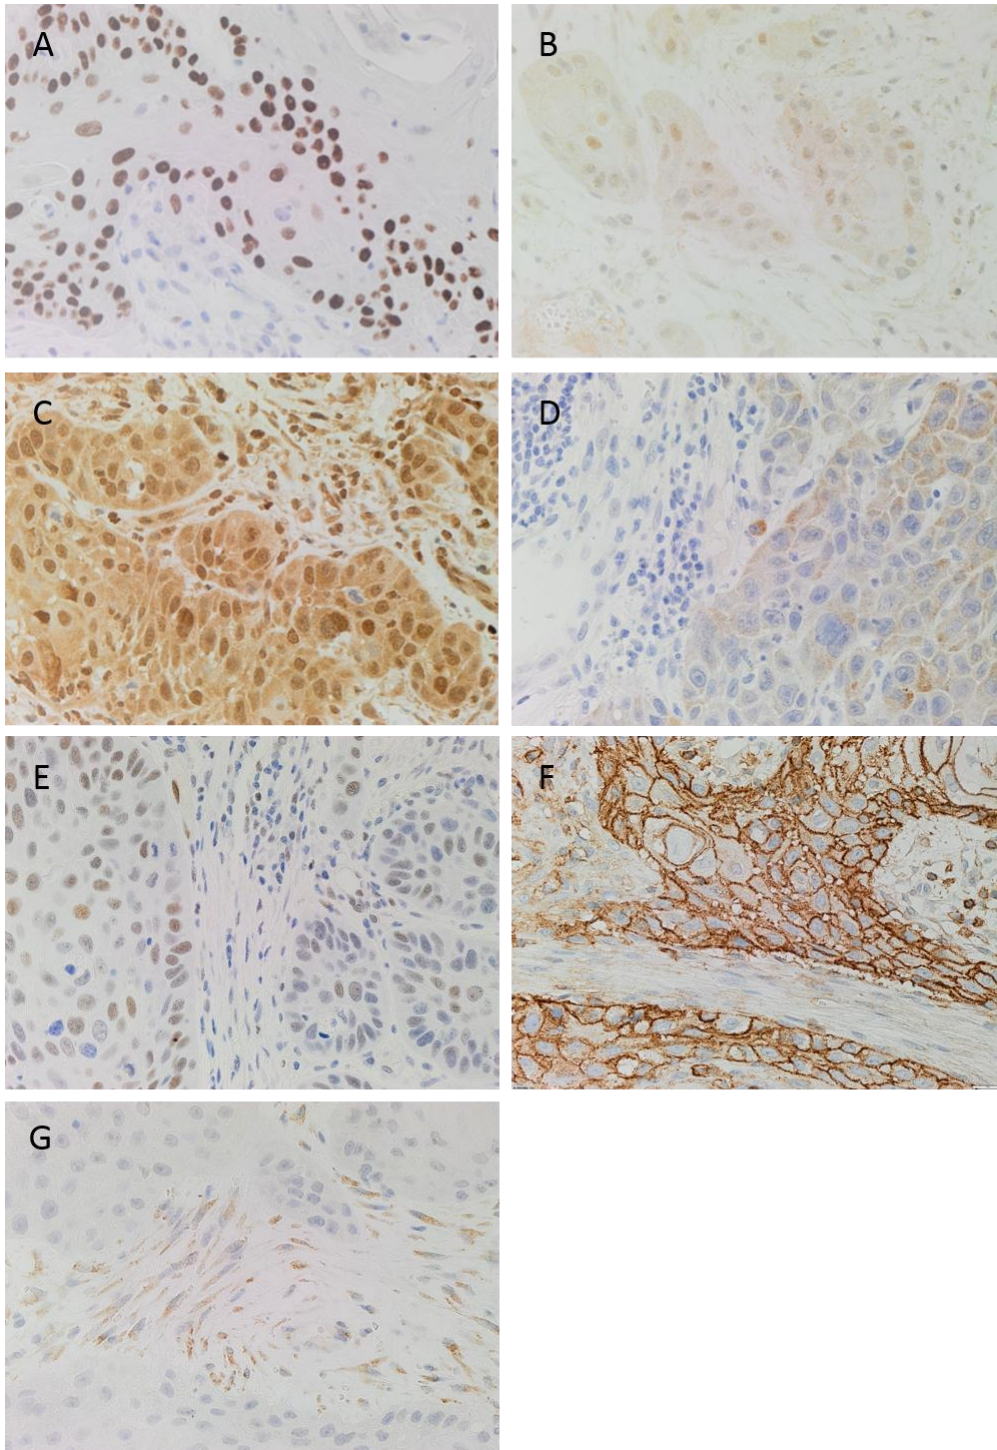

Supplement: inline-supplementary-material-2 [file inline-supplementary-material-2.pdf]
